# Supplementary material
Source: PubMed Central journal article supplement (PMC6995034)
Supplement: NIHMS1068674-supplement-Supporting_Information.pdf [file NIHMS1068674-supplement-Supporting_Information.pdf]

# Supporting Information for Computational Analysis of Energy Landscapes Reveals Dynamic Features that Contribute to Binding of Inhibitors to CFTR-Associated Ligand

Graham T. Holt,<sup>†,‡,⊥</sup> Jonathan D. Jou,<sup>†,⊥</sup> Nicholas P. Gill,<sup>¶</sup> Anna U.  
Lowegard,<sup>†,‡</sup> Jeffrey W. Martin,<sup>†</sup> Dean R. Madden,<sup>¶</sup> and  
Bruce R. Donald<sup>\*,†,§,||</sup>

<sup>†</sup>*Department of Computer Science, Duke University*

<sup>‡</sup>*Program in Computational Biology and Bioinformatics, Duke University*

<sup>¶</sup>*Department of Biochemistry & Cell Biology, Geisel School of Medicine at Dartmouth*

<sup>§</sup>*Department of Biochemistry, Duke University*

<sup>||</sup>*Department of Chemistry, Duke University*

<sup>⊥</sup>*These authors contributed equally to the work.*

*\*To whom correspondence should be addressed.*

E-mail: brd+jpc19@cs.duke.edu

Phone: 919-660-6583

# S1 Supplementary Information

## S1.1 Structural analysis

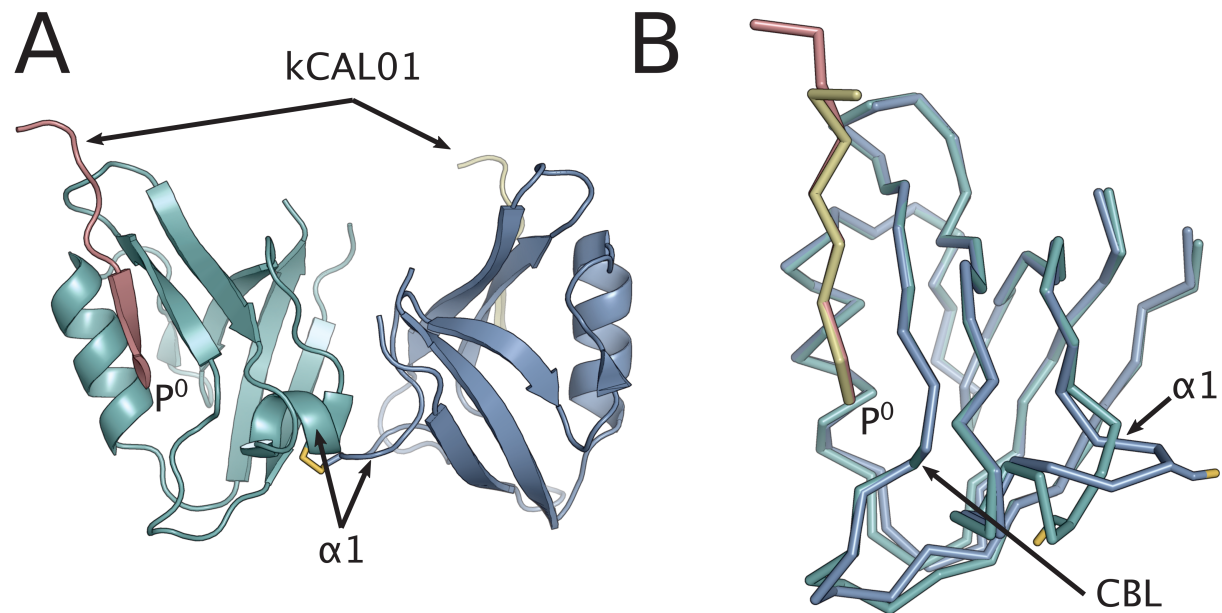

Figure S1: **Crystal structure of CALP:kCAL01 (PDB ID: 6OV7)**. CALP and kCAL01 structure models shown in green and pink, respectively (protomer A), and blue and yellow, respectively (protomer B). (A) The asymmetric unit contains two bound CALP:kCAL01 protomers, shown in cartoon representation. Note the distortion of the protomer B helix  $\alpha 1$  caused by an interprotomer cysteine bond. (B) Protomer structures aligned by main chain atoms, shown by  $C_{\alpha}$  trace. Structures align well, although notable differences in CALP conformation are found at helix  $\alpha 1$  and adjacent to the carboxylate binding loop (CBL).



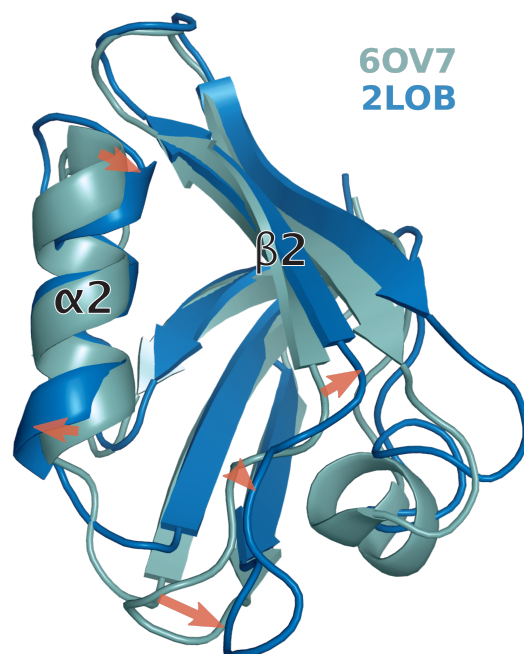

Figure S2: **Structural comparison of the CALP:kCAL01 (6OV7) crystal structure and CALP:CFTR (2LOB) NMR structure.** The CALP conformation in model 1 of the NMR structure of CALP:CFTR<sup>24</sup> (blue) displays a more relaxed binding cleft than in the CALP:kCAL01 (6OV7) crystal structure (green). Comparison of these two structures shows moderate shifts (red arrows) in strand  $\beta 2$  and helix  $\alpha 2$ . These shifts expand the binding cleft between helix  $\alpha 2$  and sheet  $\beta 2$ .

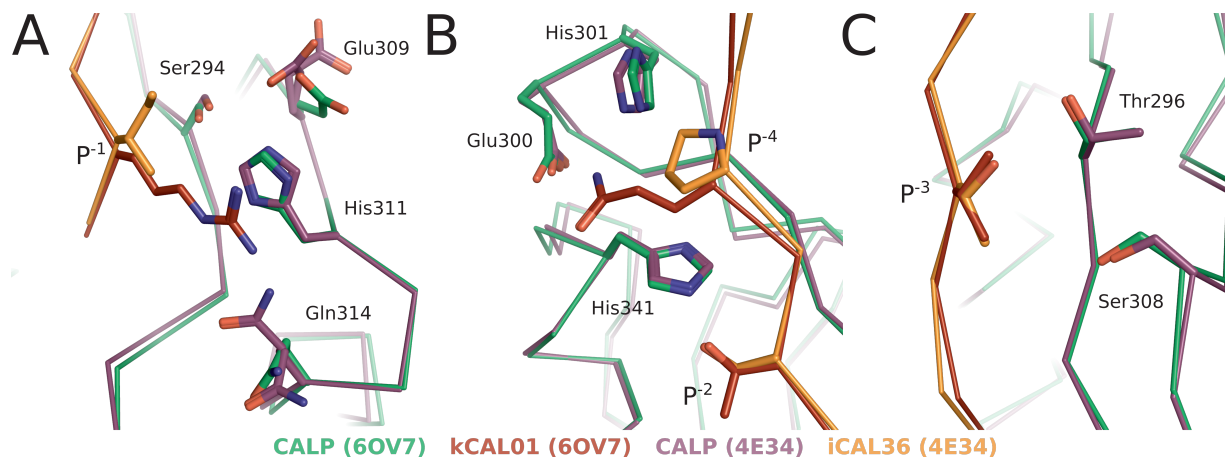

**Figure S3: Structural analysis of modulator residues reveals more favorable interactions for CALP:kCAL01.** Structural analysis of crystal structure conformations of CALP:kCAL01 (green:red) and CALP:iCAL36 (purple:orange) at peptide positions P<sup>-1</sup>, P<sup>-4</sup>, and P<sup>-3</sup> indicates that modulator residues make more favorable interactions in the kCAL01 structure. (A) kCAL01 Arg P<sup>-1</sup> forms strong  $\pi$ -interactions with His311, Van der Waals interactions with Ser294, and is able to coordinate with several water molecules (See Figure 1). In contrast, iCAL36 Ile P<sup>-1</sup> forms only minor Van der Waals interactions with His311 and forms interactions with Ser294 similar to kCAL01, suggesting that kCAL01 interacts more favorably with CALP than does iCAL36 at P<sup>-1</sup>. (B) kCAL01 Gln P<sup>-4</sup> makes favorable hydrogen bonds with Glu300 or His301, forms van der Waals interactions with His341, and is able to hydrogen bond with several waters (See Figure 1). In contrast, iCAL36 Pro P<sup>-4</sup> forms Van der Waals interactions with His341 and His301, but does not interact with Glu300, indicating that kCAL01 interacts more favorably with CALP at P<sup>-4</sup>. (C) kCAL01 Val P<sup>-3</sup> forms Van der Waals interactions with both Thr296 and Ser308, while iCAL36 Thr P<sup>-3</sup> interacts only with Ser308.

**Table S1: Inhibition constants ( $K_i$ ) and molecular weights for peptide inhibitors of CALP.**

The name, inhibition constants, and molecular weights are shown for selected inhibitors of CALP. In addition to kCAL01 (shown here), 11 additional 6-mer peptides are reported in Ref.,<sup>35</sup> all of which have lower affinity for CALP than kCAL01 by at least 5-fold ( $K_i$ ). Addition of a fluorescein dye moiety (F\*) has been shown to improve the binding to CALP of most peptide inhibitors by approximately 10-fold.<sup>25,30</sup>

| Inhibitor name                         | Inhibitor Sequence | CALP $K_i$ ( $\mu$ M) | Molecular Weight (g/mol) <sup>a</sup> |
|----------------------------------------|--------------------|-----------------------|---------------------------------------|
| CFTR <sub>10</sub> <sup>c</sup>        | TEEEVQDTRL         | 420 $\pm$ 80          | 1218.6                                |
| iCAL36 <sub>6</sub> <sup>b,e</sup>     | WPTSII             | 32.8 $\pm$ 0.3        | 818.4                                 |
| iCAL36 <sub>10</sub> <sup>c</sup>      | ANSRWPTSII         | 22.6 $\pm$ 8.0        | 1143.6                                |
| F*-iCAL36 <sub>10</sub> <sup>b,f</sup> | F*-ANSRWPTSII      | 1.3 $\pm$ 0.1         | 1501.9                                |
| kCAL01 <sub>6</sub> <sup>d</sup>       | Ac-WQVTRV          | 2.3 $\pm$ 0.2         | 829.4                                 |

<sup>a</sup>Calculated with reduced cysteines. <sup>b</sup>Values previously reported in Ref.<sup>25</sup> <sup>c</sup>Values previously reported in Ref.<sup>26</sup>

<sup>d</sup>Values previously reported in Ref.<sup>35</sup> <sup>e</sup>Peptides include an N-terminal cysteine to permit labeling. <sup>f</sup> $K_d$  values are shown for this entry.

**Table S2: Flexible residues for energy landscape computations.**

| <b>PDB ID</b> | <b>Complex name<br/>(protein:ligand)</b> | <b>Protein flexible residues<br/>(⟨Chain⟩⟨#⟩)</b>          | <b>Ligand flexible residues<br/>(⟨Chain⟩⟨#⟩)</b> | <b>Omitted residues<br/>(⟨Chain⟩⟨#⟩)</b> |
|---------------|------------------------------------------|------------------------------------------------------------|--------------------------------------------------|------------------------------------------|
| 6OV7          | CALP:kCAL01                              | A296, A300, A301, A303,<br>A306, A311, A314, A341,<br>A345 | C5, C6, C7, C8, C9, C10                          | A276, C2                                 |
| 4E34          | CALP:iCAL36                              | A319, A309, A349, A322,<br>A308, A353, A311, A314,<br>A304 | C5, C6, C7, C8, C9, C10                          | A284                                     |
| 1BE9          | PSD-95<br>PDZ3:CRIP1                     | A326, A328, A331, A339,<br>A372, A376, A380                | B5, B6, B7, B8, B9                               | A301, A302                               |
| 1MFG          | Erbin<br>PDZ:ErbB2                       | A1294, A1296, A1302,<br>A1316, A1347, A1351                | B1250, B1251, B1252,<br>B1253, B1254, B1255      | A1277, B1247                             |
| 3NGH          | PDZK1<br>PDZ1:SR-B1                      | B23, B25, B26, B28, B68,<br>B72, B76                       | A106, A107, A108, A109,<br>A110, A111            | B6, A103                                 |
| 3RL7          | hDLG1<br>PDZ1:APC                        | A237, A239, A243, A244,<br>A256, A289, A293                | G2838, G2839, G2840,<br>G2841, G2842, G2843      | A220, G2837                              |
| 4K6Y          | CALP:iCAL36-<br>Q                        | B304, B308, B309, B311,<br>B314, B319, B322, B349,<br>B353 | D5, D6, D7, D8, D9, D10                          | B284                                     |
| 4K72          | CALP:iCAL36-<br>VQD                      | B304, B308, B309, B311,<br>B314, B319, B322, B349,<br>B353 | D5, D6, D7, D8, D9, D10                          | B284                                     |
| 4K75          | CALP:iCAL36-<br>QDTRL                    | A304, A308, A309, A311,<br>A314, A319, A322, A349,<br>A353 | B5, B6, B7, B8, B9, B10                          | A284, B4                                 |
| 4K76          | CALP:iCAL36-<br>TRL                      | D304, D308, D309, D311,<br>D314, D319, D322, D349,<br>D353 | H5, H6, H7, H8, H9, H10                          | D284, D327                               |
| 4WYU          | Scribble<br>PDZ3:peptide                 | A27, A29, A34, A49, A81,<br>A85                            | D-5, D-4, D-3, D-2,<br>D-1, D0                   | A3                                       |
| 5VWK          | Scribble<br>PDZ1:Beta-<br>PIX            | A741, A748, A749, A751,<br>A761, A793, A797                | H158, H159, H160, H161,<br>H162, H163            | A714, A716                               |

## S1.2 Bound landscapes for kCAL01 and iCAL36

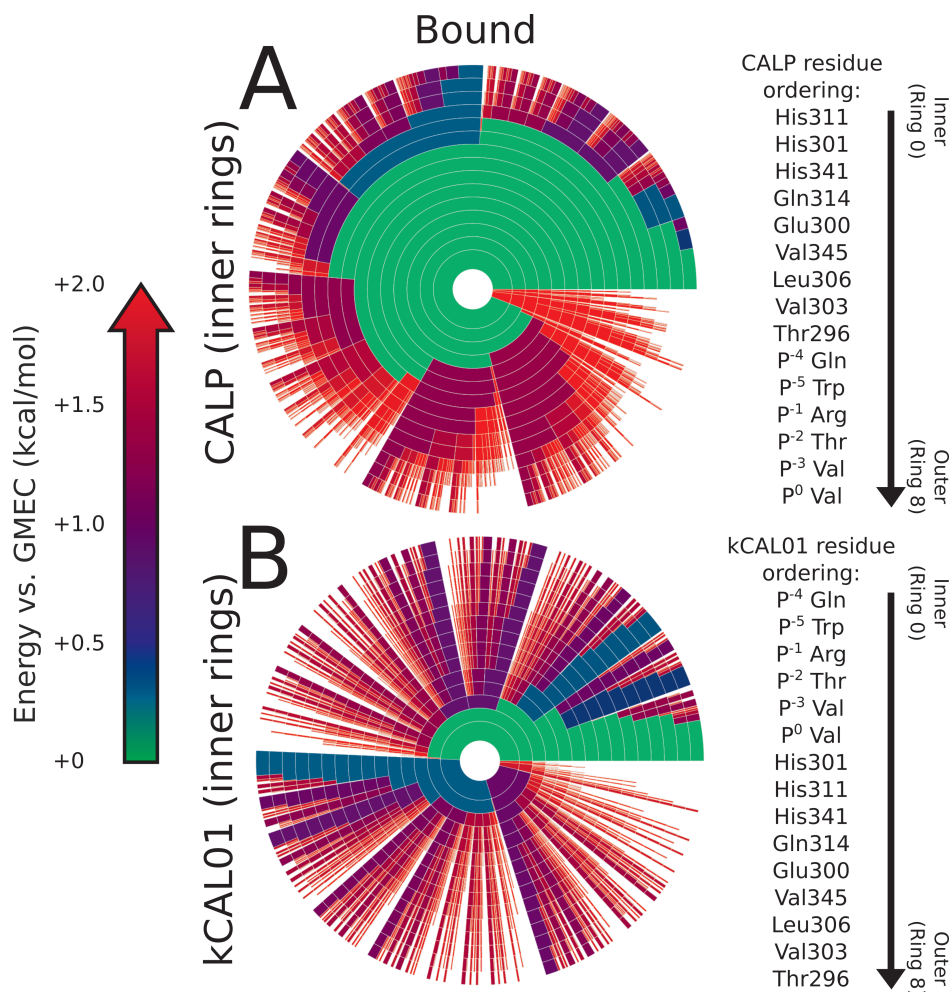

Figure S4: **Energy landscapes for the bound CALP:kCAL01 complex.** Upper bounds on the Boltzmann-weighted partition function computed using the *MARK\** algorithm<sup>63</sup> for a 15-residue design at the protein-protein interface of CALP:kCAL01 are shown as colored ring charts. (A) Bound landscape (protein:inhibitor) with CALP residues shown in the inner rings, kCAL01 residues shown in the outer rings. (B) Bound landscape (protein:inhibitor) with kCAL01 residues shown in the inner rings, CALP residues shown in the outer rings.

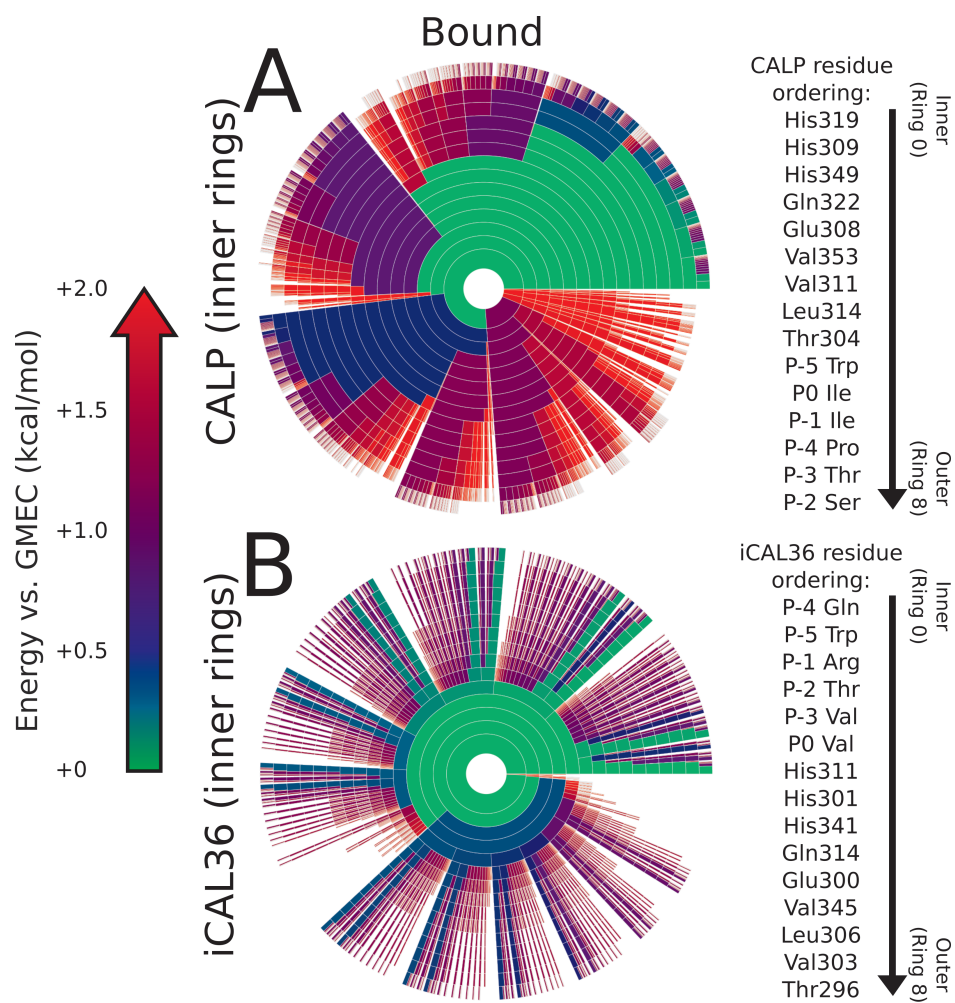

Figure S5: **Energy landscapes for the bound CALP:iCAL36 complex.** Upper bounds on the Boltzmann-weighted partition function computed using the *MARK\** algorithm<sup>63</sup> for a 15-residue design at the protein-protein interface of CALP:iCAL36 are shown as colored ring charts. (A) Bound landscape (protein:inhibitor) with CALP residues shown in the inner rings, iCAL36 residues shown in the outer rings. (B) Bound landscape (protein:inhibitor) with iCAL36 residues shown in the inner rings, CALP residues shown in the outer rings.

### **S1.3 Energy landscapes for other PDZ domain models**

Here we present energy landscapes of PDZ:peptide binding for various PDZ complexes. In particular, we investigate PDZ domains from the PSD-95, Erbin, PDZK1 (or NHERF3), Discs large homolog 1 (DLG1), Scribble, and CAL proteins. For each system, landscapes were generated as described in Sections 2.2 and 2.3 of the main manuscript. Briefly, the bound and unbound states were defined using one protein complex from the asymmetric unit of each crystal structure. Hydrogens were added using MolProbity,<sup>70</sup> and selected residues (See Figure S2) were designated as continuously flexible using continuous rotamers.<sup>71,72</sup> Partition functions were approximated to a guaranteed accuracy of  $\varepsilon < 0.1$ , using *MARK\** in OSPREY, and energy landscapes were generated using the same protocol as those in the main manuscript.

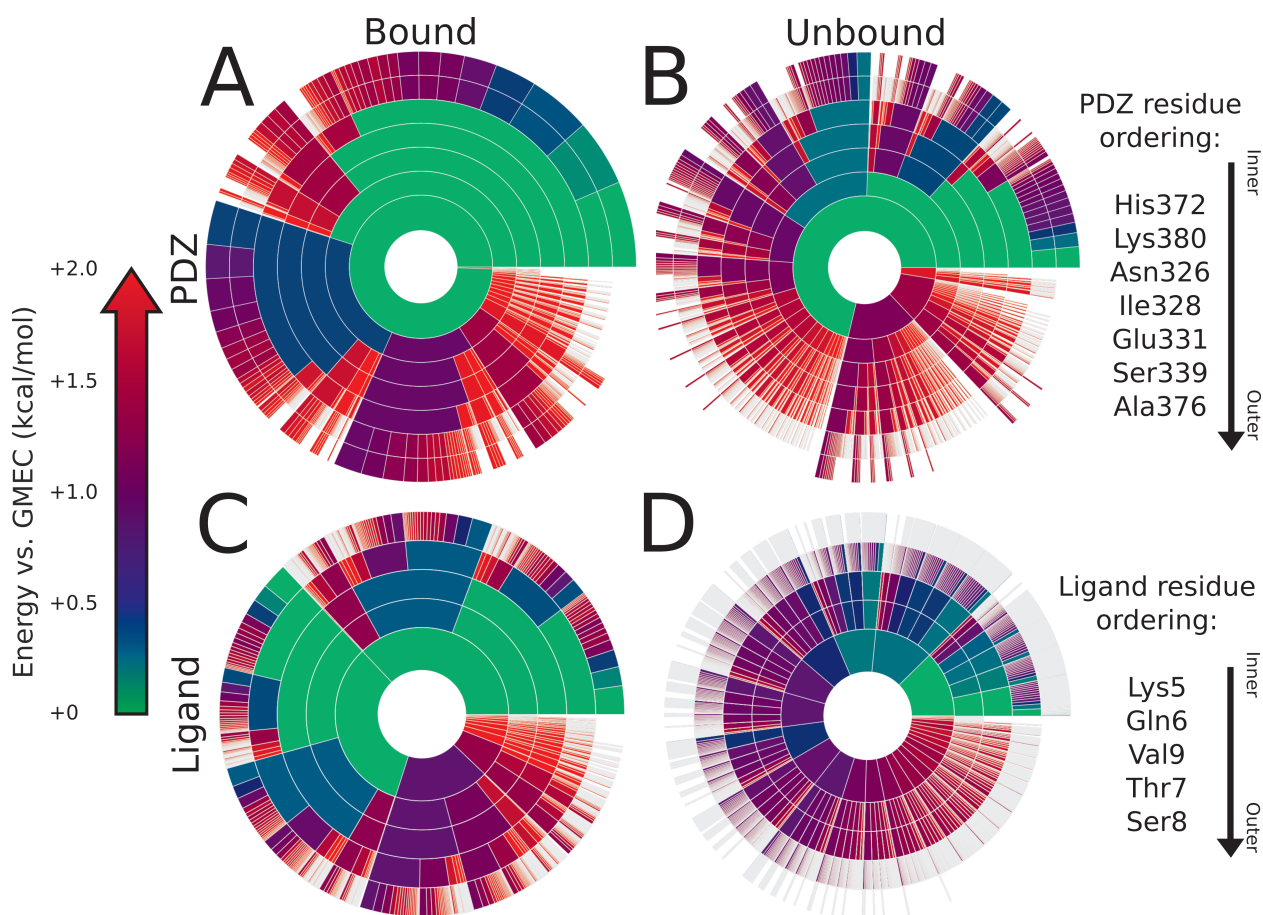

Figure S6: **Energy landscapes of binding for PSD-95 PDZ3:CRIP1 (PDB: 1BE9) binding interface.** Upper bounds on the Boltzmann-weighted partition function computed using the *MARK\** algorithm<sup>63</sup> in *OSPREDY*<sup>37</sup> for a design at the protein-protein interface of PSD-95 PDZ3:CRIP1 (PDB: 1BE9) shown as colored ring charts. A brief explanation of the ring chart diagram can be found in Section 2.4. Energy landscapes for the PDZ binding domain in the bound (A) and unbound (B) states, along with landscapes for the peptide ligand in the bound (C) and unbound (D) states are shown.



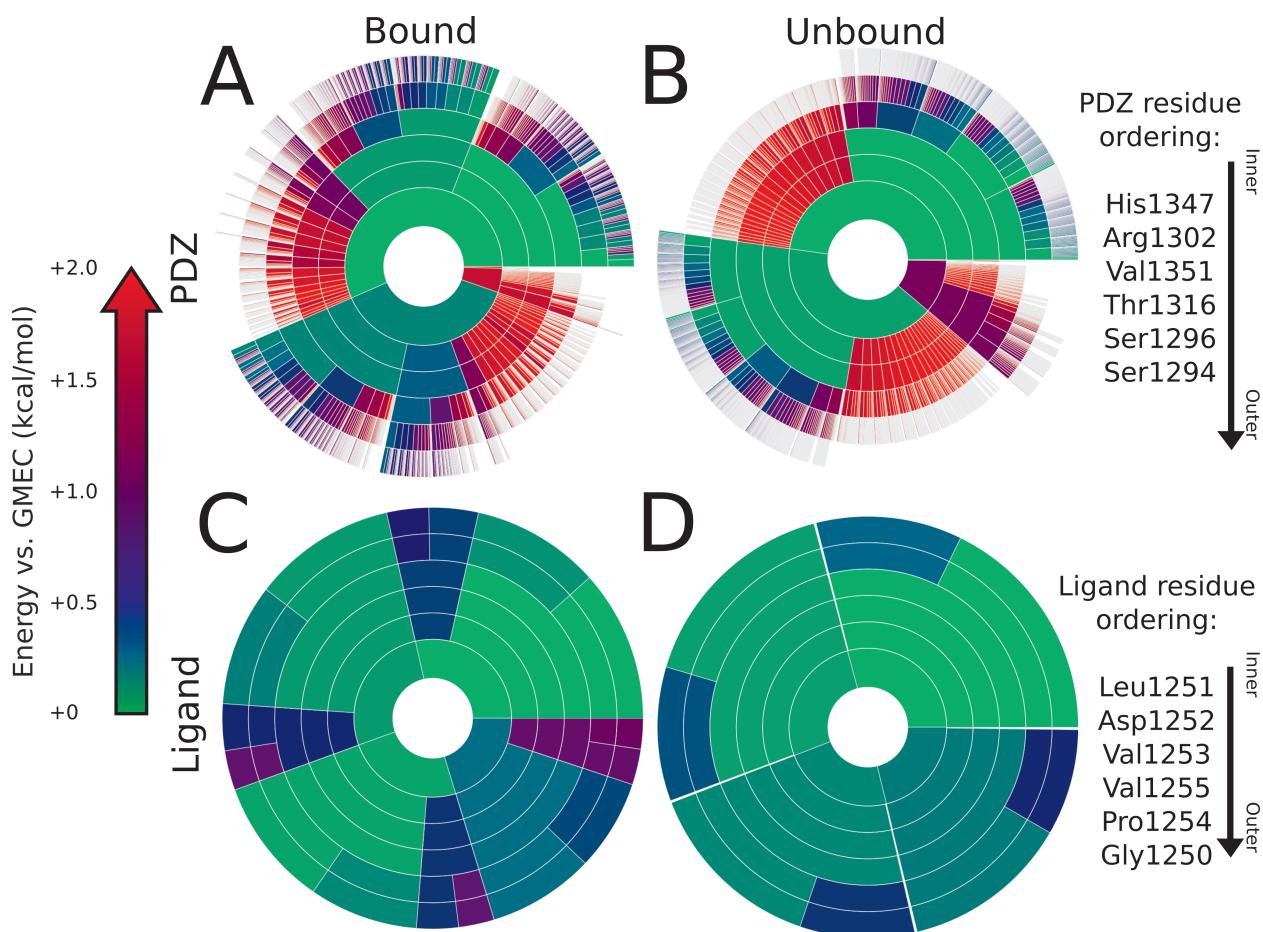

Figure S7: **Energy landscapes of binding for Erbin PDZ:ErbB2 (PDB: 1MFG) binding interface.** Upper bounds on the Boltzmann-weighted partition function computed using the *MARK\** algorithm<sup>63</sup> in *OSPREY*<sup>37</sup> for a design at the protein-protein interface of Erbin PDZ:ErbB2 (PDB: 1MFG) shown as colored ring charts. A brief explanation of the ring chart diagram can be found in Section 2.4. Energy landscapes for the PDZ binding domain in the bound (A) and unbound (B) states, along with landscapes for the peptide ligand in the bound (C) and unbound (D) states are shown.

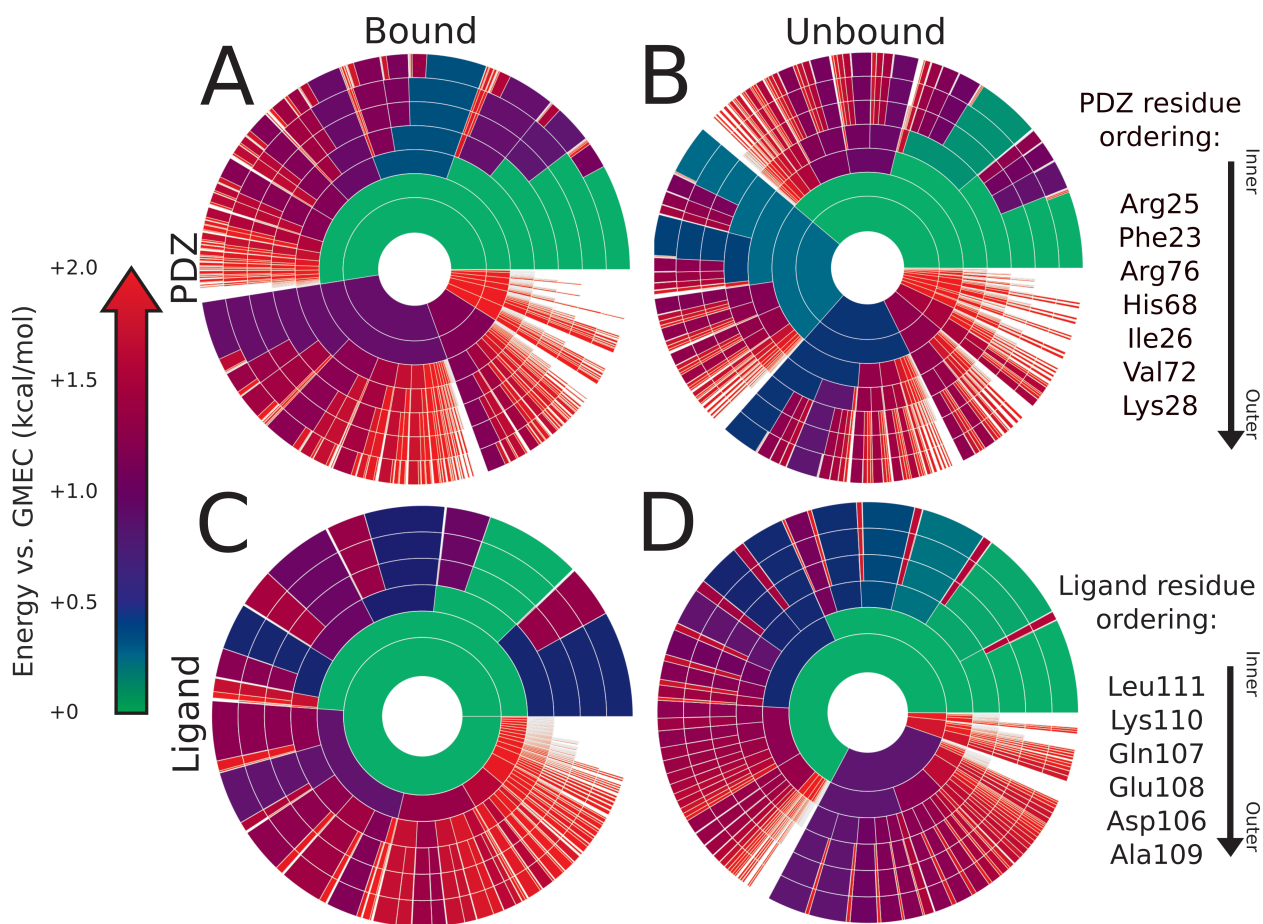

Figure S8: **Energy landscapes of binding for PDZK1 PDZ1:SR-B1 (PDB: 3NGH) binding interface.** Upper bounds on the Boltzmann-weighted partition function computed using the *MARK\** algorithm<sup>63</sup> in *OSPREY*<sup>37</sup> for a design at the protein-protein interface of PDZK1 PDZ1:SR-B1 (PDB: 3NGH) shown as colored ring charts. A brief explanation of the ring chart diagram can be found in Section 2.4. Energy landscapes for the PDZ binding domain in the bound (A) and unbound (B) states, along with landscapes for the peptide ligand in the bound (C) and unbound (D) states are shown.

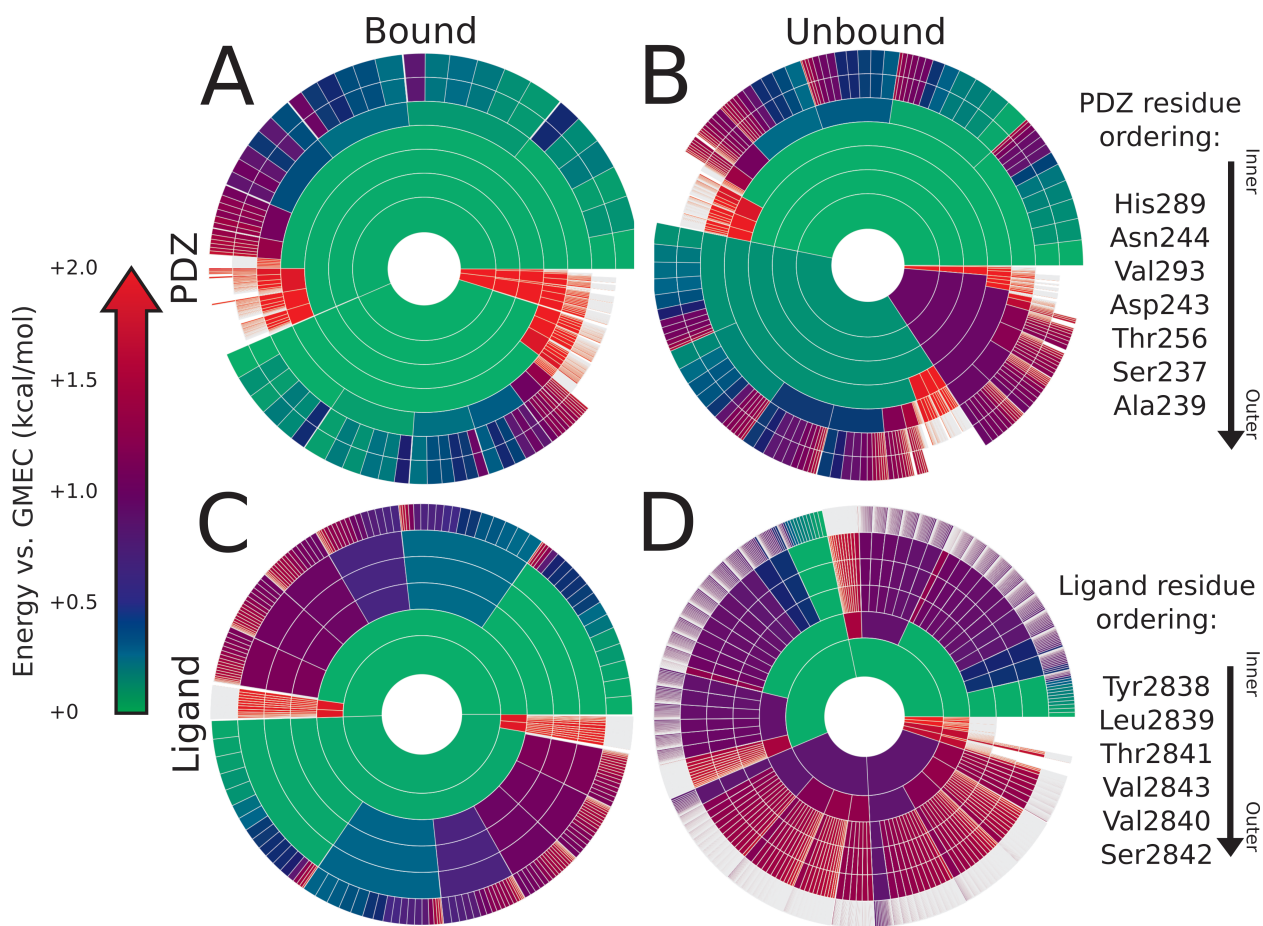

Figure S9: **Energy landscapes of binding for hDLG1 PDZ1:APC (PDB: 3RL7) binding interface.** Upper bounds on the Boltzmann-weighted partition function computed using the *MARK\** algorithm<sup>63</sup> in *OSPREY*<sup>37</sup> for a design at the protein-protein interface of hDLG1 PDZ1:APC (PDB: 3RL7) shown as colored ring charts. A brief explanation of the ring chart diagram can be found in Section 2.4. Energy landscapes for the PDZ binding domain in the bound (A) and unbound (B) states, along with landscapes for the peptide ligand in the bound (C) and unbound (D) states are shown.

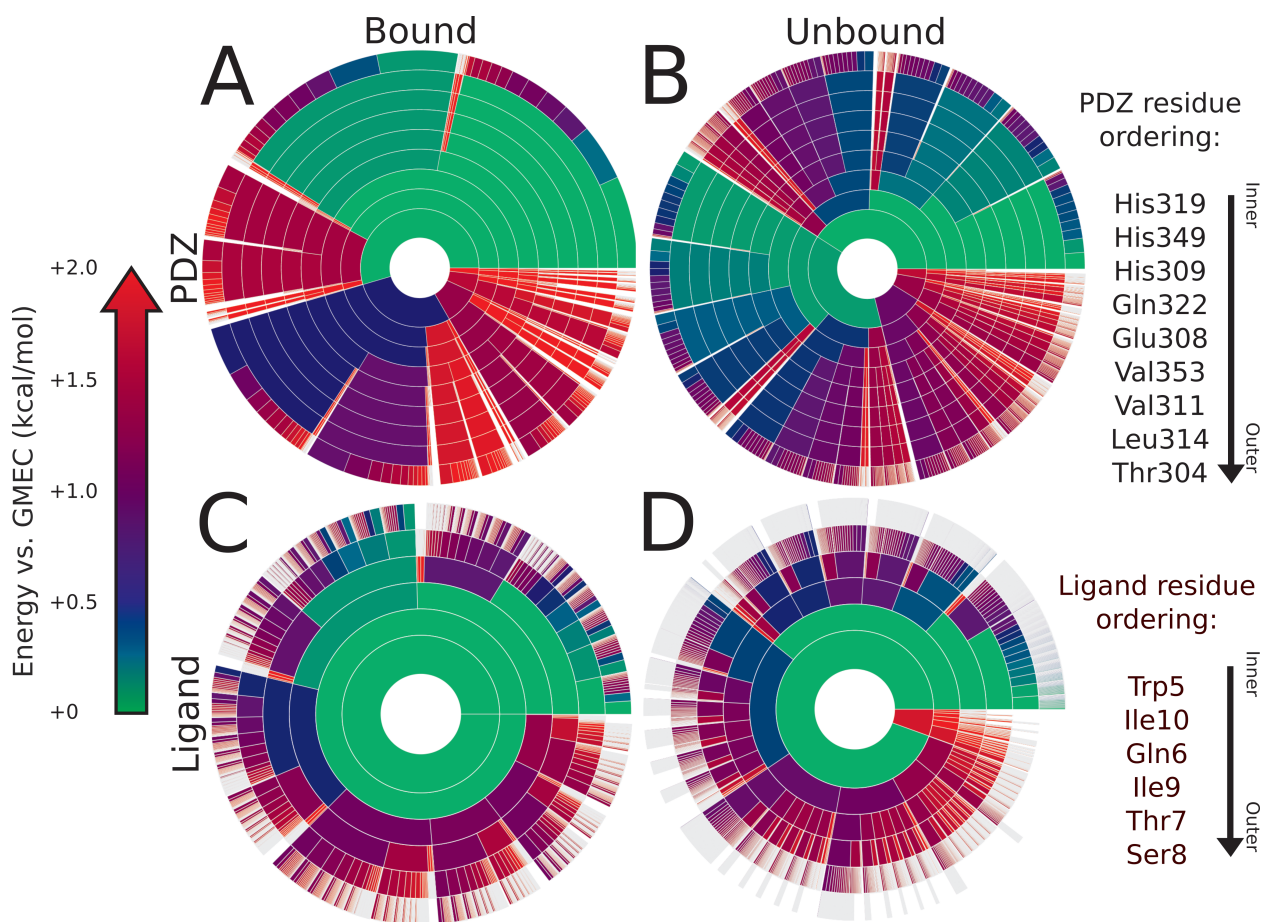

Figure S10: **Energy landscapes of binding for CALP:iCAL36-Q (PDB: 4K6Y) binding interface.** Upper bounds on the Boltzmann-weighted partition function computed using the *MARK\** algorithm<sup>63</sup> in *OSPREY*<sup>37</sup> for a design at the protein-protein interface of CALP:iCAL36-Q (PDB: 4K6Y) shown as colored ring charts. A brief explanation of the ring chart diagram can be found in Section 2.4. Energy landscapes for the PDZ binding domain in the bound (A) and unbound (B) states, along with landscapes for the peptide ligand in the bound (C) and unbound (D) states are shown.

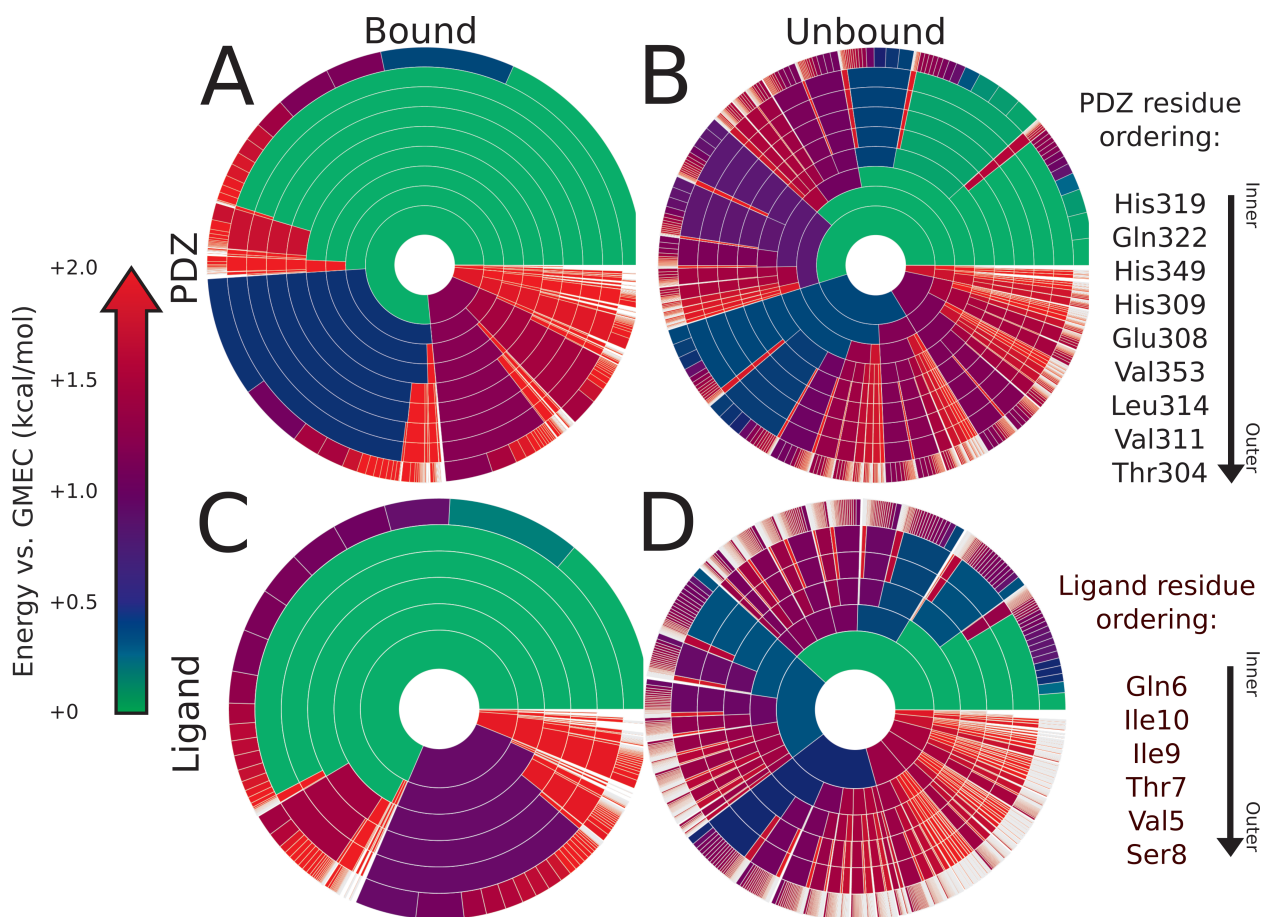

Figure S11: **Energy landscapes of binding for CALP:iCAL36-VQD (PDB: 4K72) binding interface.** Upper bounds on the Boltzmann-weighted partition function computed using the *MARK\** algorithm<sup>63</sup> in *OSPREY*<sup>37</sup> for a design at the protein-protein interface of CALP:iCAL36-VQD (PDB: 4K72) shown as colored ring charts. A brief explanation of the ring chart diagram can be found in Section 2.4. Energy landscapes for the PDZ binding domain in the bound (A) and unbound (B) states, along with landscapes for the peptide ligand in the bound (C) and unbound (D) states are shown.



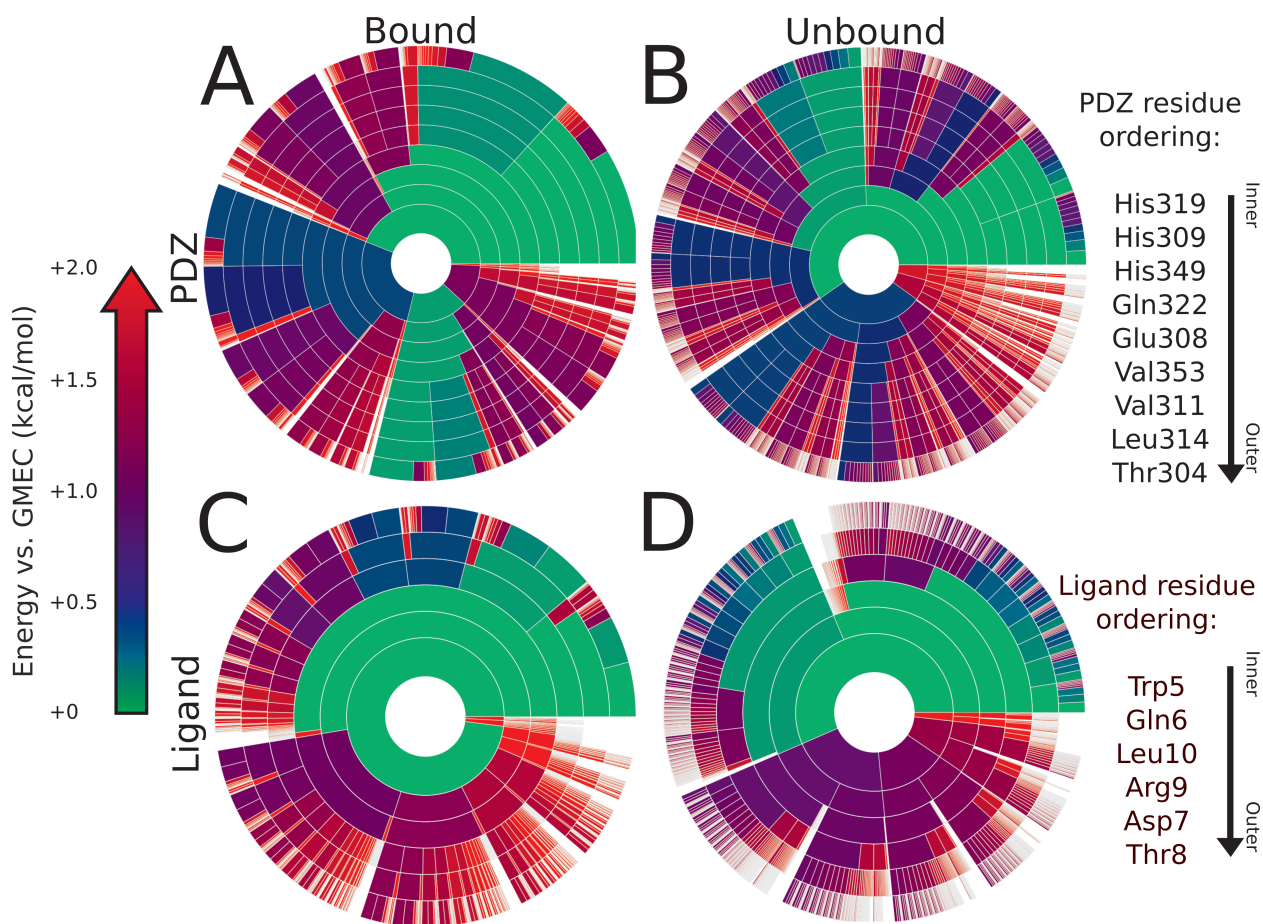

Figure S12: **Energy landscapes of binding for CALP:iCAL36-QDTRL (PDB: 4K75) binding interface.** Upper bounds on the Boltzmann-weighted partition function computed using the *MARK\** algorithm<sup>63</sup> in OSPREY<sup>37</sup> for a design at the protein-protein interface of CALP:iCAL36-QDTRL (PDB: 4K75) shown as colored ring charts. A brief explanation of the ring chart diagram can be found in Section 2.4. Energy landscapes for the PDZ binding domain in the bound (A) and unbound (B) states, along with landscapes for the peptide ligand in the bound (C) and unbound (D) states are shown.

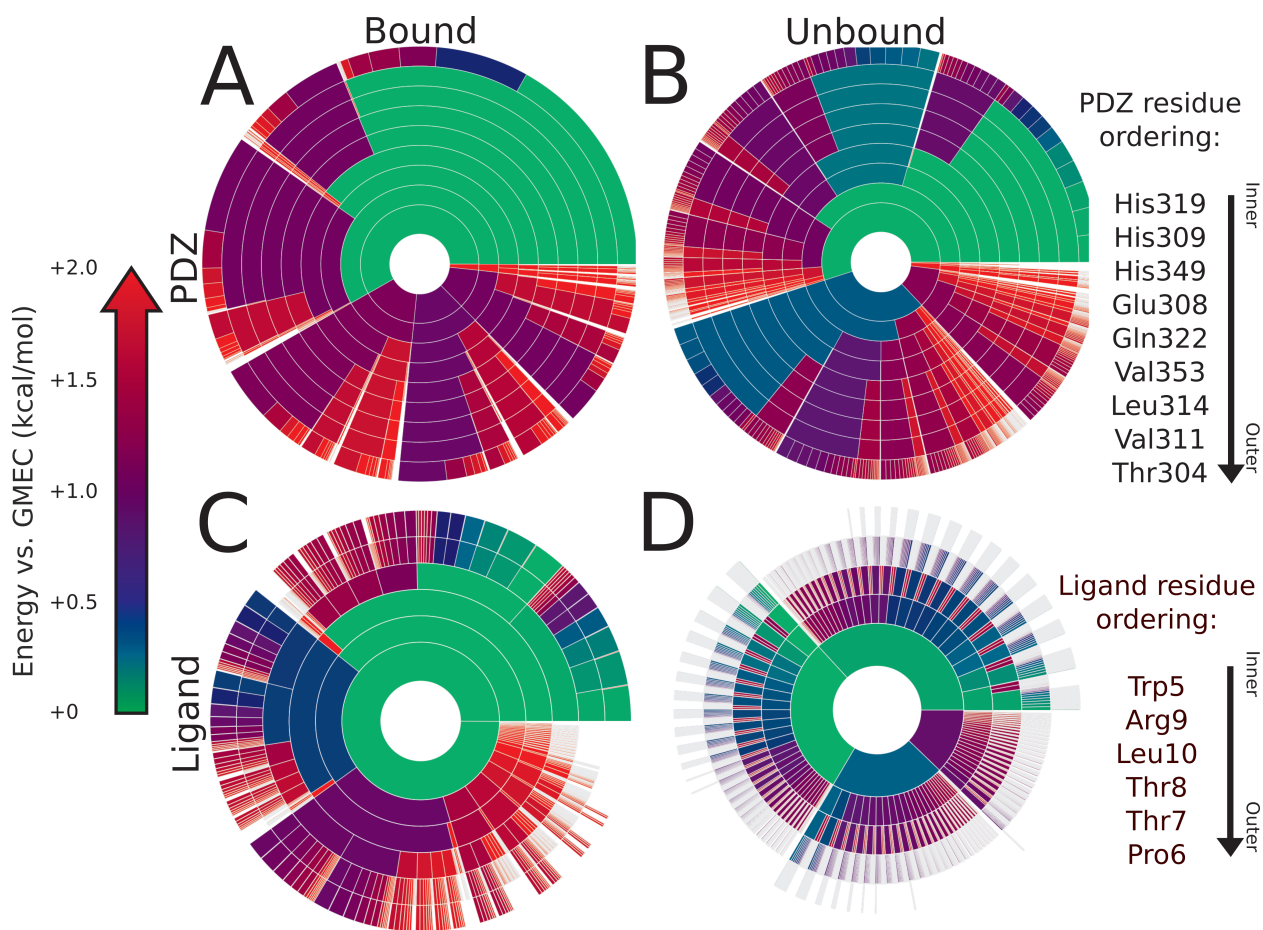

Figure S13: **Energy landscapes of binding for CALP:iCAL36-TRL (PDB: 4K76) binding interface.** Upper bounds on the Boltzmann-weighted partition function computed using the *MARK\** algorithm<sup>63</sup> in *OSPREY*<sup>37</sup> for a design at the protein-protein interface of CALP:iCAL36-TRL (PDB: 4K76) shown as colored ring charts. A brief explanation of the ring chart diagram can be found in Section 2.4. Energy landscapes for the PDZ binding domain in the bound (A) and unbound (B) states, along with landscapes for the peptide ligand in the bound (C) and unbound (D) states are shown.

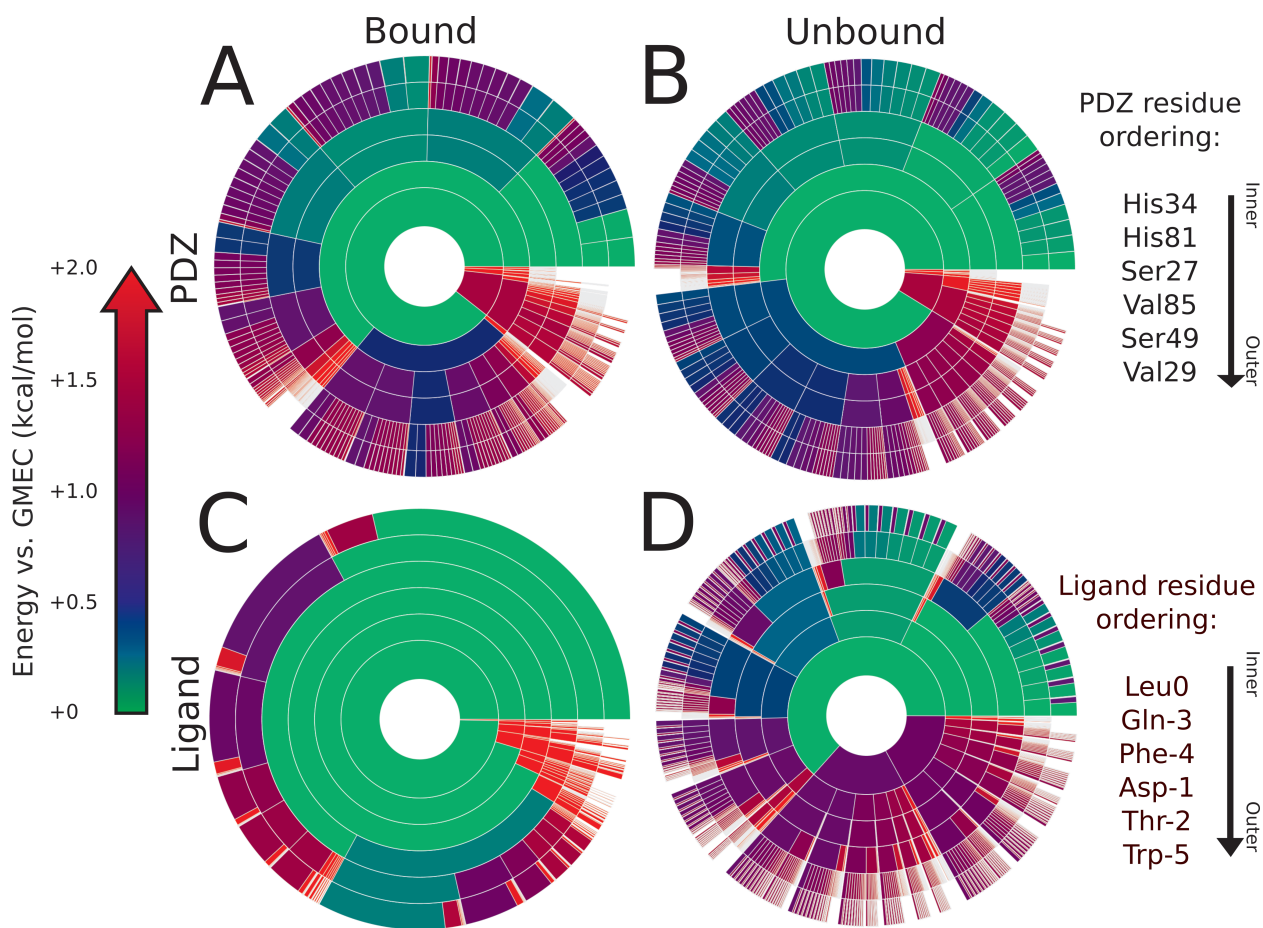

Figure S14: **Energy landscapes of binding for Scribble PDZ3:peptide (PDB: 4WYU) binding interface.** Upper bounds on the Boltzmann-weighted partition function computed using the *MARK\** algorithm<sup>63</sup> in *OSPREDY*<sup>37</sup> for a design at the protein-protein interface of Scribble PDZ3:peptide (PDB: 4WYU) shown as colored ring charts. A brief explanation of the ring chart diagram can be found in Section 2.4. Energy landscapes for the PDZ binding domain in the bound (A) and unbound (B) states, along with landscapes for the peptide ligand in the bound (C) and unbound (D) states are shown.



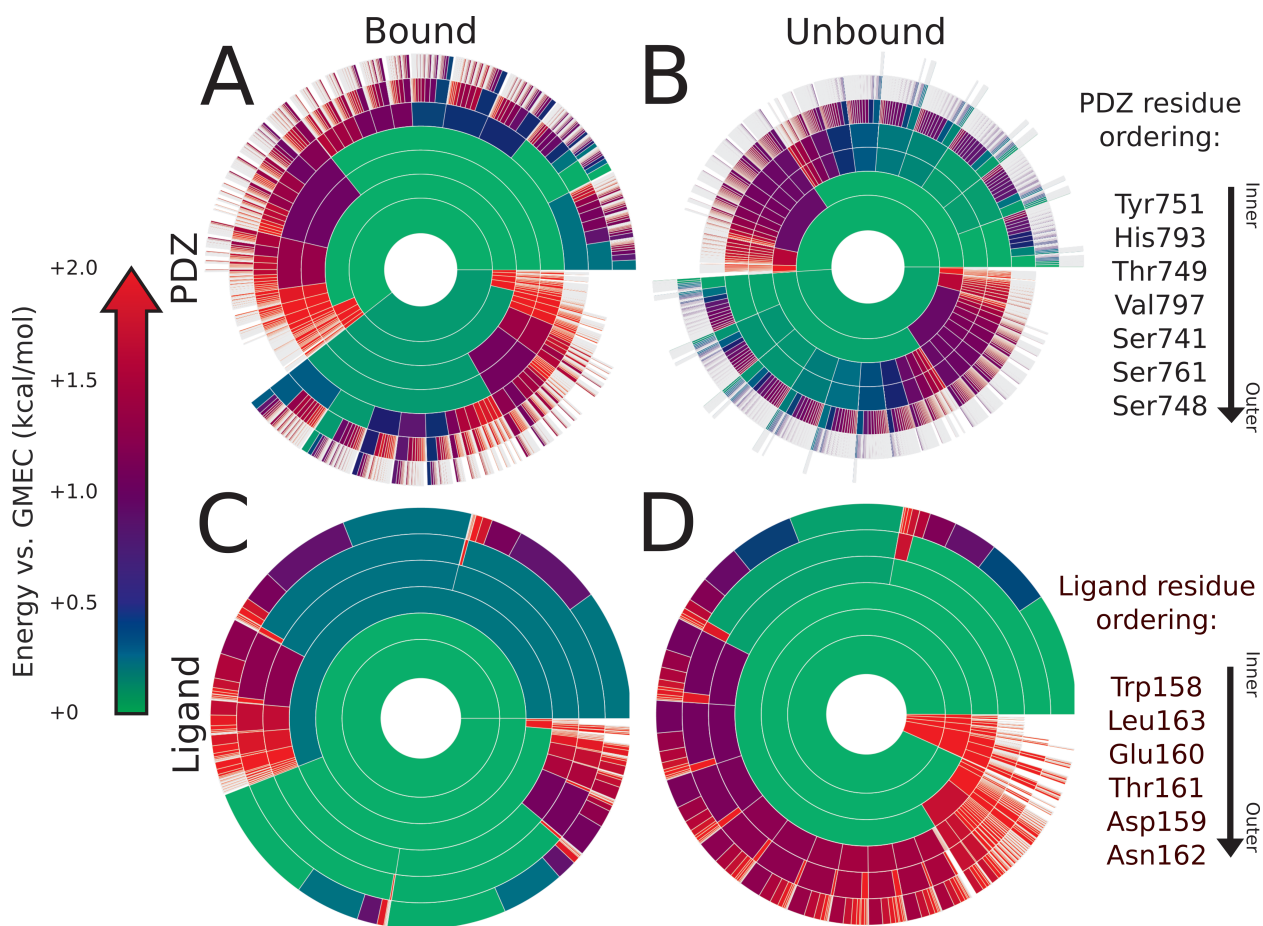

Figure S15: **Energy landscapes of binding for Scribble PDZ1:Beta-PIX (PDB: 5VWK) binding interface.** Upper bounds on the Boltzmann-weighted partition function computed using the *MARK\** algorithm<sup>63</sup> in *OSPREY*<sup>37</sup> for a design at the protein-protein interface of Scribble PDZ1:Beta-PIX (PDB: 5VWK) shown as colored ring charts. A brief explanation of the ring chart diagram can be found in Section 2.4. Energy landscapes for the PDZ binding domain in the bound (A) and unbound (B) states, along with landscapes for the peptide ligand in the bound (C) and unbound (D) states are shown.

## **S1.4 A discussion on energy landscape residue ordering**

This implementation of the *MARK\** partition function approximation algorithm uses a greedy heuristic in order to choose a residue ordering while provably computing the partition function. We note that this heuristic does not affect the value of the partition function approximation. This heuristic chooses the next residue by selecting the residue with the largest difference between conformation energy bounds from the set of unassigned residues. This heuristic is loosely related to the concept of entropy, as one might expect large differences in energy between conformations to be indicative of a narrower landscape (i.e. less entropy), and small differences in energy to be indicative of a broader landscape (i.e. more entropy). However, since conformation energy bounds can be loose, this heuristic does not strictly order residues by entropy.
